# Supplementary material for: TiO2fibre/particle nanohybrids as efficient anodes for lithium-ion batteries
Source: Royal Society of Chemistry journal article supplement (doi:10.1039/c6ra04889g), 2016-01-01
Supplement: c6ra04889g1.pdf [file c6ra04889g1.pdf]

## **Electronic Supplementary Information**

### **TiO<sub>2</sub> fiber/particle nanohybrids as efficient anodes for Lithium-ion batteries**

*D. Damien,<sup>a</sup> G. S. Anjusree,<sup>b</sup> A. Sreekumaran Nair<sup>\*b</sup> and M. M. Shaijumon<sup>\*a</sup>*

<sup>a</sup> Indian Institute of Science Education and Research Thiruvananthapuram, Engineering  
College PO, Thiruvananthapuram, Kerala, 695016, India.

<sup>b</sup> Amrita Centre for Nanoscience & Molecular Medicine, Amrita Institute of Medical  
Sciences, Amrita Vishwa Vidyapeetham, AIMS Ponekkara PO, Cochin, 682041, Kerala,  
India.

\* E-mail: shaiju@iisertvm.ac.in; sreekumarannair@aims.amrita.edu

## Determination of capacitive contribution to the total charge stored

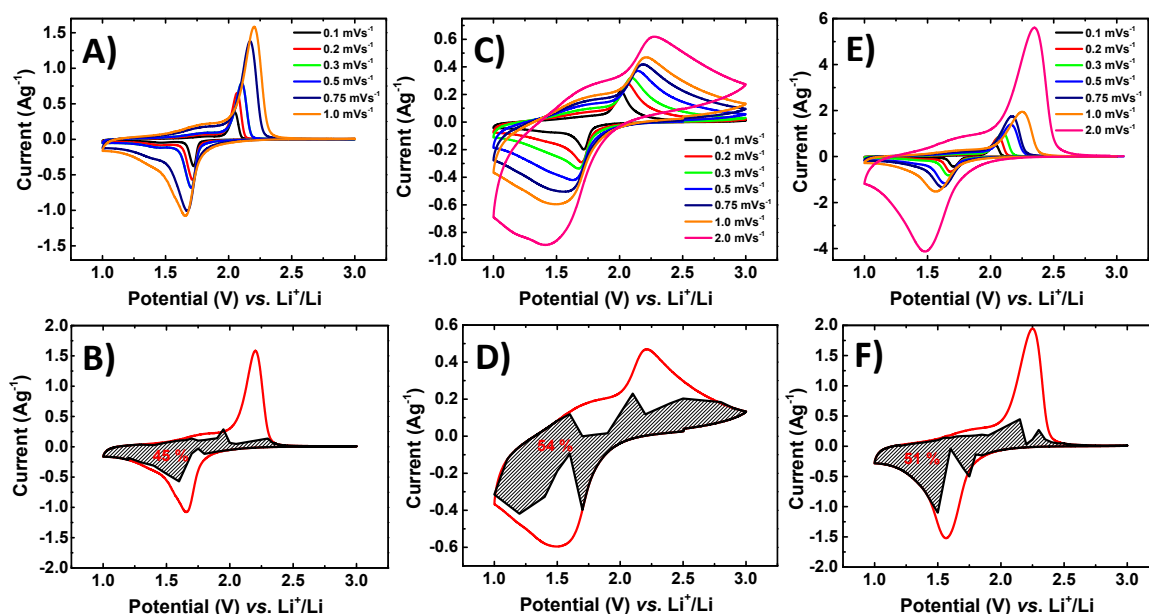

**Fig. S1** Voltammetric responses of  $\text{TiO}_2$  based electrodes when cycled at scan rates of 0.1-2.0  $\text{mVs}^{-1}$ . A, C & E show the CV of  $\text{TiO}_2$  particles, fibres and fibre/particle composite respectively, at different scan rates specified and B, D & F show the capacitive current contribution (shaded area) to the total current for  $\text{TiO}_2$  particles, fibres and fibre/particle composite respectively obtained by cyclic voltammetry at 1  $\text{mVs}^{-1}$ .

Capacitive effects in the charge storage process can be characterized by analysing cyclic voltammograms at various scan rates. Cyclic voltammograms of  $\text{TiO}_2$  based electrodes were obtained at various scan rates of 0.1, 0.2, 0.3, 0.5, 0.75, 1.0, 2.0  $\text{mVs}^{-1}$  as shown in **Fig. S1 A, C & E**. The cyclic voltammetric current is assumed to obey a power-law relationship

$$i = av^b \quad \rightarrow (1)$$

where  $i$  the measured current,  $v$  sweep rate,  $a$  and  $b$  are the adjustable parameters. The value of  $b$  determines two well-defined conditions: for  $b = 0.5$ , the current is controlled by semi-infinite linear diffusion, which indicates a faradaic intercalation process and for  $b = 1$  designate for capacitive response where the current is surface-controlled as represented in **Fig. S2**.

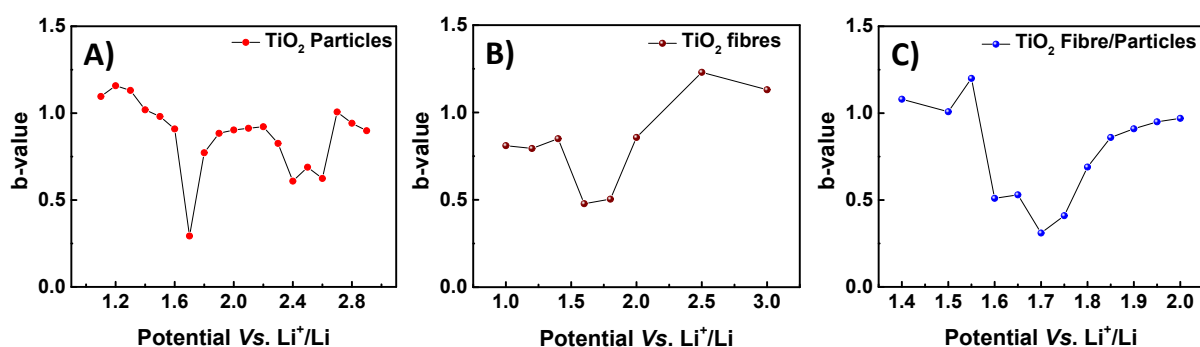

**Fig. S2** A-C) represent the b-value at different potentials during the cathodic sweep for various electrodes based on TiO<sub>2</sub> particles, fibres and particle/fibre composites respectively.

At a fixed potential the power law can be divided into two parts:

$$i(V) = k_1 v + k_2 v^{1/2} \quad \rightarrow (2)$$

where  $k_1 v$  and  $k_2 v^{1/2}$  are the current contributions due to capacitive and diffusion-controlled intercalation processes respectively and ' $v$ ' be the scan rate.

By rearranging, we get

$$\frac{i(V)}{v^{1/2}} = k_1 v^{1/2} + k_2 \quad \rightarrow (3)$$

an equation resembling a straight line with slope ' $k_1$ ' and intercept ' $k_2$ '. From the plot of

$\frac{i(V)}{v^{1/2}}$  as a function of  $v^{1/2}$  we can calculate the coefficients ' $k_1$ ' and ' $k_2$ ' from the 'slope' and

'y-intercept' of the straight line plot respectively. Upon substituting  $k_1$  &  $k_2$  in equation (2) we can separate the capacitive current and diffusion current each other (**Fig. S1B, D & F**).

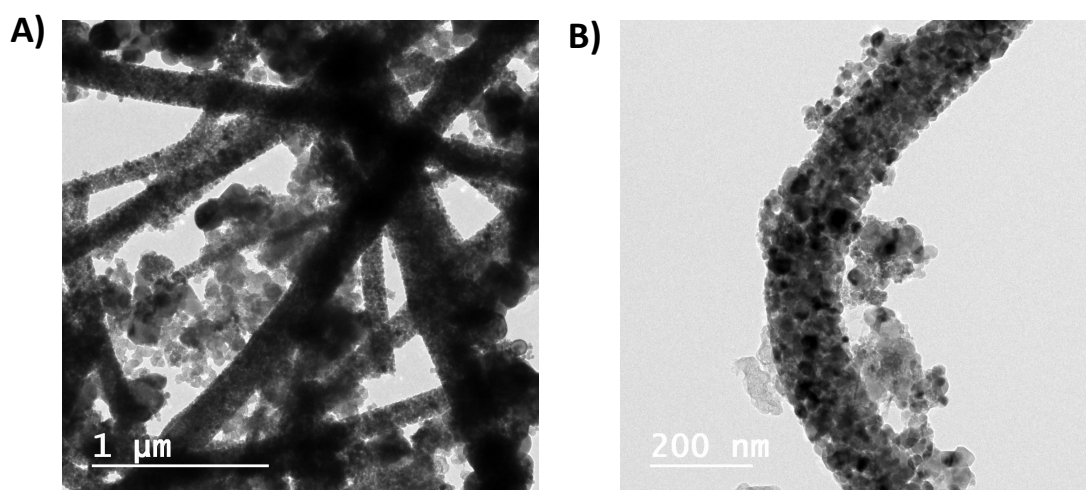

**Fig. S3** TEM analysis of the spent cell fabricated using  $\text{TiO}_2$  particle/fibre composite electrode. (A) and (B) show the low and high resolution TEM image of the  $\text{TiO}_2$  particle/fibre composite after the galvanostatic cycling.
